# Supplementary material for: Portable Raman Spectrometer as a Screening Tool for Characterization of Iberian Dry-Cured Ham
Source: MDPI journal article supplement (doi:10.3390/foods10061177), 2021-05-24
Supplement: s1 [file s1]

# Portable Raman spectrometer as a screening tool for characterization of Iberian dry-cured ham

A. Martín-Gómez<sup>1</sup>, N. Arroyo-Manzanares<sup>2\*</sup>, M. García-Nicolás<sup>2</sup>, A.I. López-Lorente<sup>1</sup>, S. Cárdenas<sup>1</sup>, I. López-García<sup>2</sup>, P. Viñas<sup>2</sup>, M. Hernández-Córdoba<sup>2</sup> and L. Arce<sup>1</sup>

<sup>1</sup> Department of Analytical Chemistry, Institute of Fine Chemistry and Nanochemistry, Marie Curie Annex Building, Campus de Rabanales, 14071 Córdoba, Spain; [q02magoa@uco.es](mailto:q02magoa@uco.es) (A.M.-G); [q32loloa@uco.es](mailto:q32loloa@uco.es) (A.I.L.-L); [qa1caarm@um.es](mailto:qa1caarm@um.es) (S.C.); [qa1arjil@um.es](mailto:qa1arjil@um.es) (L.A.)

<sup>2</sup> Department of Analytical Chemistry, Faculty of Chemistry, Regional Campus of International Excellence “Campus Mare Nostrum”, University of Murcia, E-30100 Murcia, Spain; [maria.garcia66@um.es](mailto:maria.garcia66@um.es) (M.G.-N.); [ilgarcia@um.es](mailto:ilgarcia@um.es) (I.L.-G.); [pilarvi@um.es](mailto:pilarvi@um.es) (P.V.); [hcordoba@um.es](mailto:hcordoba@um.es) (M.H.C.)

\* Correspondence: [natalia.arroyo@um.es](mailto:natalia.arroyo@um.es) (N.A.-M.)

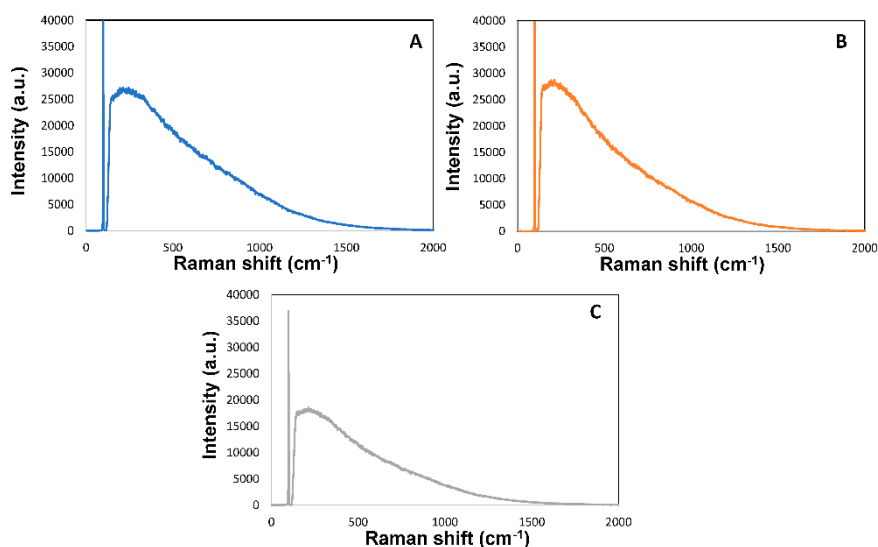

**Supplemental Figure S1.** Spectra from the different samples categories: A) 50% Iberian acorn-fed, B) 100% Iberian acorn-fed, C) 75% Iberian feed-fed.

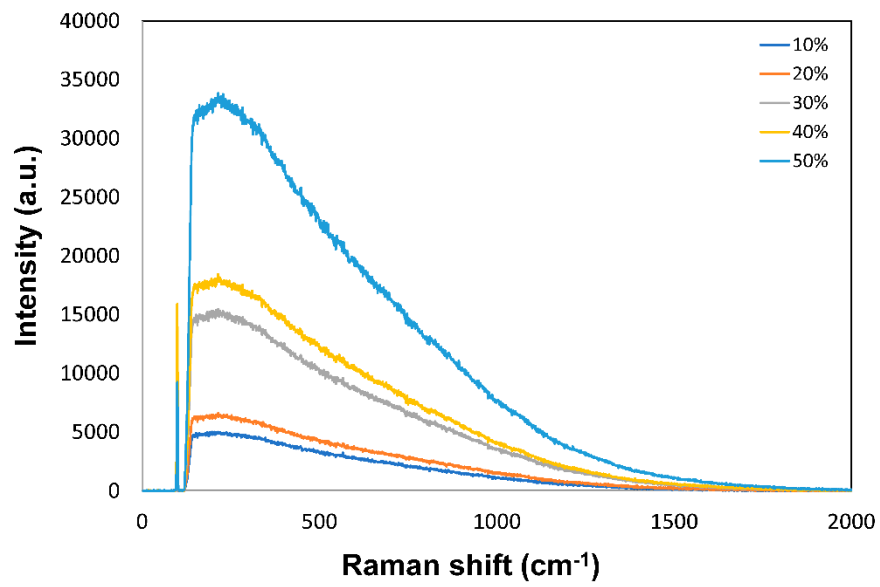

**Supplemental Figure S2.** Laser power optimization.
